# Supplementary material for: Repurposing auranofin and meclofenamic acid as energy-metabolism inhibitors and anti-cancer drugs
Source: PLoS One. 2024 Sep 17;19(9):e0309331. doi: 10.1371/journal.pone.0309331 (PMC11407620; doi:10.1371/journal.pone.0309331)
Supplement: S2 Table — (DOCX) [file pone.0309331.s004.docx]

**S2 Table.** Therapeutic Index Ratio (TI ratio) for Auranofin (Aur) and Meclofenamic (MA) acid in bi-dimensional mouse 3T3 fibroblast or mouse H9C2 cardiomyocytes *versus* cancer cells.

| **Chemotherapy drugs** | **TI ratio (3T3/ cancer cells)** | | | | | | | |
| --- | --- | --- | --- | --- | --- | --- | --- | --- |
|  | **MDA-MB-231** | **MDA-MB-468** | **HeLa** | **PC3** | **HCT-116** | **COLO 205** | **U373** | **MCF-7** |
| **Aur** | 52 | 21 | 25 | 6 | 14 | 7 | 70 | 8 |
| **MA** | 2 | ND | 17 | 17 | 1 | ND | ND | 1 |

|  | **TI ratio (H9C2/cancer cells)** | | | | | | | |
| --- | --- | --- | --- | --- | --- | --- | --- | --- |
| **Aur** | 97 | 39 | 46 | 12 | 26 | 13 | 130 | 15 |
| **MA** | 2 | ND | 17 | 17 | 1 | ND | ND | 1 |

TI ratios were calculated from the IC50 values of Aur or MA shown in Table 1. TI corresponds to the quotient of the IC50 values for 3T3 fibroblast or H9C2 cardiomyocytes divided by IC50 values for each cancer cell line. ND, not determined.
